## Knockout of Angiotensin AT<sub>2</sub> receptors accelerates healing but impairs quality

Mahya Faghih<sup>1</sup>, Sayed M. Hosseini<sup>2</sup>, Barbara Smith<sup>3</sup>, Amir Mehdi. Ansari<sup>2</sup>, Frank Lay<sup>2</sup>, Ali Karim Ahmed<sup>2</sup>, Tedashi Inagami<sup>4</sup>, Guy P. Marti<sup>2</sup>, John W. Harmon<sup>2</sup>, Jeremy D. Walston<sup>1</sup>, and Peter M. Abadir<sup>1</sup>

<sup>1</sup>Division of Geriatric Medicine and Gerontology, Johns Hopkins University School of Medicine, Baltimore, MD 21224, USA;

<sup>2</sup>Department of Surgery and Hendrix Burn/Wound Laboratory, Johns Hopkins University School of Medicine, Baltimore, MD 21224, USA;

<sup>3</sup>Cell Biology Imaging Facility, Johns Hopkins University School of Medicine Baltimore, MD 21224, USA;

<sup>4</sup>Department of Biochemistry, Vanderbilt University School of Medicine, Nashville, TN 37232, USA.

**Key words:** Angiotensin, AT<sub>1</sub>R, AT<sub>2</sub>R, TGF

**Abbreviations:** Ang II, angiotensin II; AT<sub>1</sub>R, Angiotensin II type 1 receptors; AT<sub>2</sub>R, Angiotensin II type 2 receptors; AT<sub>1</sub>R<sup>-/-</sup>, Angiotensin II type 1 receptors knockout; AT<sub>2</sub>R<sup>-/-</sup>, Angiotensin II type 2 receptors knockout; TGFβ, transforming growth factor-β

**Received:** 12/04/15; **Accepted:** 12/02/15; **Published:** 12/31/15

**Correspondence to:** Peter M. Abadir, MD; **E-mail:** [Pabadir1@jhmi.edu](mailto:Pabadir1@jhmi.edu)

**Copyright:** Faghih et al. This is an open-access article distributed under the terms of the Creative Commons Attribution License, which permits unrestricted use, distribution, and reproduction in any medium, provided the original author and source are credited

**Abstract:** Wounds are among the most common, painful, debilitating and costly conditions in older adults. Disruption of the angiotensin type 1 receptors (AT<sub>1</sub>R), has been associated with impaired wound healing, suggesting a critical role for AT<sub>1</sub>R in this repair process. Biological functions of angiotensin type 2 receptors (AT<sub>2</sub>R) are less studied. We investigated effects of genetically disrupting AT<sub>2</sub>R on rate and quality of wound healing. Our results suggest that AT<sub>2</sub>R effects on rate of wound closure depends on the phase of wound healing. We observed delayed healing during early phase of wound healing (inflammation). An accelerated healing rate was seen during later stages (proliferation and remodeling). By day 12, fifty percent of AT<sub>2</sub>R<sup>-/-</sup> mice had complete wound closure as compared to none in either C57/BL6 or AT<sub>1</sub>R<sup>-/-</sup> mice. There was a significant increase in AT<sub>1</sub>R, TGFβ<sub>1</sub> and TGFβ<sub>2</sub> expression during the proliferative and remodeling phases in AT<sub>2</sub>R<sup>-/-</sup> mice. Despite the accelerated closure rate, AT<sub>2</sub>R<sup>-/-</sup> mice had more fragile healed skin. Our results suggest that in the absence of AT<sub>2</sub>R, wound healing rate is accelerated, but yielded worse skin quality. Elucidating the contribution of both of the angiotensin receptors may help fine tune future intervention aimed at wound repair in older individuals.

### INTRODUCTION

The biology of normal wound healing includes sequential yet overlapping inflammatory, proliferative, and remodeling phases that involve complex biological signaling [1-4]. Dysregulation of specific signaling pathways is thought to underlie skin breakdown and poor healing [1-4]. The renin angiotensin system (RAS) is active in connective tissue and skin, and is known to be important in wound healing [5-7]. RAS is involved in the inflammatory response, collagen depo-

sition and in tissue-related growth factor (TGFβ) signaling necessary for wound healing [5-9]. RAS is known to be dysregulated in both aging and in diabetes, with increased AT<sub>1</sub>R and decreased AT<sub>2</sub>R expression in diabetic wound healing and in aging [5;10], which may play a role in aging skin vulnerability [5;7;8;10]. Indeed, altered dermal AT<sub>1</sub>R and AT<sub>2</sub>R ratio is associated with thinning of epidermis, degeneration of collagen, fracture of dermal layer, and atrophy of subcutaneous fat in diabetic rats [5]. These changes are consistent with those seen clinically in aging skin.

AT<sub>1</sub>R blockers impair fibroblast migration and delay wound healing [11]. The angiotensin subtype 2 receptor is less studied, but its anti-inflammatory, anti-apoptotic and anti-proliferative effects are thought to oppose the effects of AT<sub>1</sub>R [12]. Virtually nothing is known about the contribution of the AT<sub>2</sub>R to stages of wound healing. The overarching hypothesis of this study is that a functional balance between skin expression of AT<sub>1</sub>R and AT<sub>2</sub>R is required for optimal healing. We further hypothesized that targeted deletion of AT<sub>2</sub>R would accelerate wound healing rate via un-opposed AT<sub>1</sub>R activity upregulating skin TGFβ signaling. To dissect the role of AT<sub>2</sub>R on wound healing we have selected the genetic knockout to avoid the effects of variations in drug delivery to wound bed. Furthermore, given that Angiotensin II binds with equal affinity to AT<sub>1</sub>R or AT<sub>2</sub>R, the knockout of the angiotensin receptors allows for better discrimination of the effects of the receptors by eliminating the possibility of remaining unblocked receptors. In this study we compared C57BL/6J wild-type (WT) mice to age- and gender-matched; AT<sub>1</sub>R knockout (*AT<sub>1</sub>R*<sup>-/-</sup>) mice and AT<sub>2</sub>R knockout (*AT<sub>2</sub>R*<sup>-/-</sup>) mice.

## RESULTS

To ascertain the influence of angiotensin receptors on wound healing, downstream effectors and healed skin quality, we compared C57BL/6J wild-type (WT) mice to age- and gender-matched; AT<sub>1</sub>R knockout (*AT<sub>1</sub>R*<sup>-/-</sup>) mice and AT<sub>2</sub>R knockout (*AT<sub>2</sub>R*<sup>-/-</sup>) mice.

## Delayed wound healing in *AT<sub>1</sub>R*<sup>-/-</sup> and accelerated wound healing in *AT<sub>2</sub>R*<sup>-/-</sup> mice

RAS is a key hormonal system whose dysregulation has been linked to aging, inflammation, and impaired wound healing. We show that the *AT<sub>1</sub>R*<sup>-/-</sup> mice were the most delayed in wound healing as compared to WT and the *AT<sub>2</sub>R*<sup>-/-</sup> (Figure 1, panel A, B and C) which is in agreement with previous reports on wound healing in *AT<sub>1</sub>R*<sup>-/-</sup> mice [11]. In contrast, the healing rate in the *AT<sub>2</sub>R*<sup>-/-</sup> mice was accelerated which was unexpected given that AT<sub>2</sub>R levels in general correlate with positive outcomes [12]. By day 12, 50% of the animals in the *AT<sub>2</sub>R*<sup>-/-</sup> cohort achieved complete wound healing as compared to none in either the *AT<sub>1</sub>R*<sup>-/-</sup> or WT mice ( $P < 0.05$ ). By day 12, only 5% of the size of wounds remained unhealed in the *AT<sub>2</sub>R*<sup>-/-</sup> mice vs. 17% in the *AT<sub>1</sub>R*<sup>-/-</sup> and 11% in WT mouse cohorts ( $P < 0.05$ ; Figure 1, panel C and E). All the *AT<sub>2</sub>R*<sup>-/-</sup> mice were healed completely by day 16 as compared to 10% of WT and 30% of *AT<sub>1</sub>R*<sup>-/-</sup> that remained with open wounds ( $P < 0.05$ ; Figure 1: panel C and E). Further analysis of the fastest healing group, the *AT<sub>2</sub>R*<sup>-/-</sup>, revealed a delayed healing during the inflammatory phase of wound healing (day1-7) and an accelerated healing during proliferative and remodeling phases (day8-16). (Figure 1D) This biphasic pattern of healing observed in the *AT<sub>2</sub>R*<sup>-/-</sup> group, was not seen in either the *AT<sub>1</sub>R*<sup>-/-</sup> or WT mice.

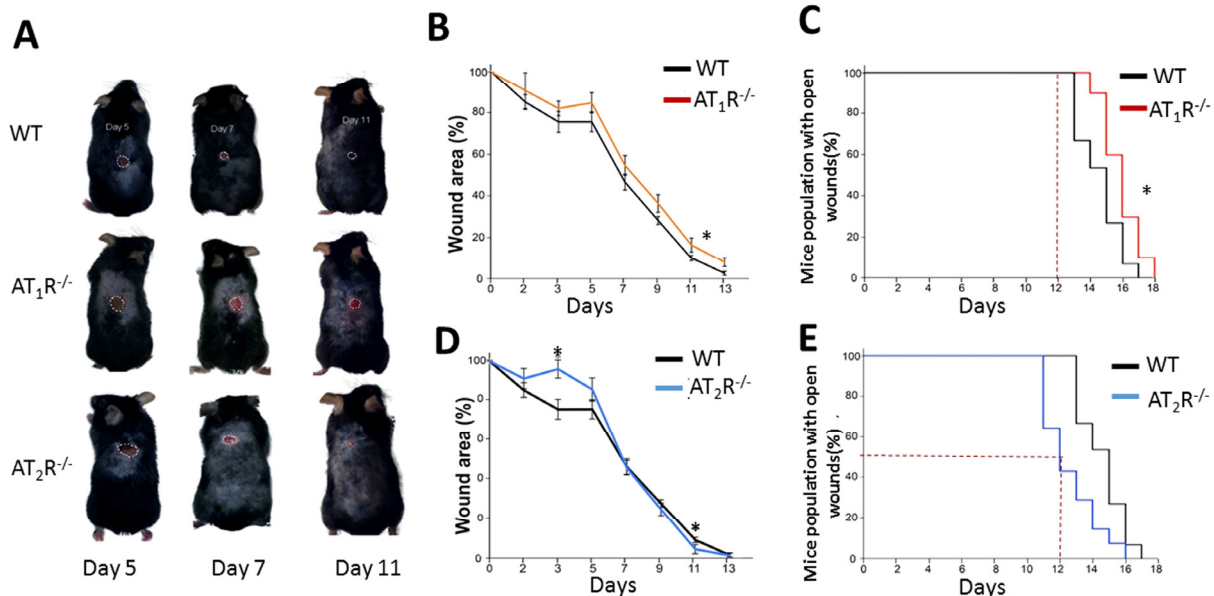

**Figure 1.** Wound closure measurements in *AT<sub>1</sub>R* and *AT<sub>2</sub>R* transgenic mice show delayed *AT<sub>1</sub>R*<sup>-/-</sup> and accelerated *AT<sub>2</sub>R*<sup>-/-</sup> healing rate. (A) Representative images from WT, *AT<sub>1</sub>R*<sup>-/-</sup> and *AT<sub>2</sub>R*<sup>-/-</sup> mouse cohorts on day 5, 7 and 11 of wound healing. Planimetric assessment of wound closure rate in *AT<sub>1</sub>R*<sup>-/-</sup> (B) and *AT<sub>2</sub>R*<sup>-/-</sup> (D). Complete wound closure of *AT<sub>1</sub>R*<sup>-/-</sup> (Panel C) and *AT<sub>2</sub>R*<sup>-/-</sup> (E) mice. Data are means ± SEM \* $p < 0.05$ .

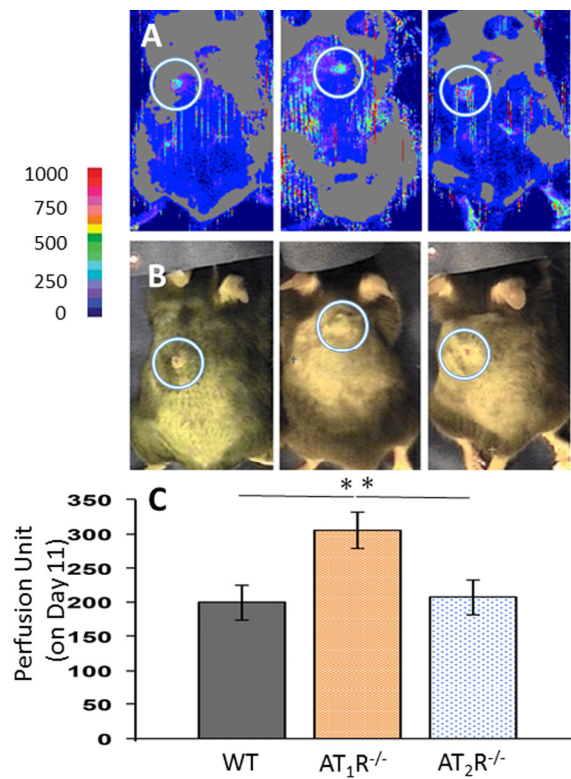

**Figure 2.** Laser Doppler perfusion imaging of wound area blood flow on day 11 of wound healing shows a higher blood flow in wounds of AT<sub>1</sub>R<sup>-/-</sup>. Data are means ± SEM \**p*<0.05.

### Increase in wound blood flow in the AT<sub>1</sub>R<sup>-/-</sup> mice

Given the prominent role for angiotensin receptors in tissue perfusion and to determine if changes in blood flow to the wounds contributed to the observed healing pattern in AT<sub>1</sub>R<sup>-/-</sup> and AT<sub>2</sub>R<sup>-/-</sup> mice, wound area blood flow was measured by non-invasive LDPI on days 7 and 11. There were no differences in wound area blood flow among the three groups by day 7, but by day 11 we observed a significantly higher value in the AT<sub>1</sub>R<sup>-/-</sup> as compared to the other two groups (*P*<0.05; Figure 2). Interestingly, the increase in blood flow in the AT<sub>1</sub>R<sup>-/-</sup> mice did not correlate with better wound healing. Further, we did not observe differences in wound blood flow the AT<sub>2</sub>R<sup>-/-</sup> as compared with WT controls, suggesting that changes in blood flow did not contribute to the accelerated healing observed in the AT<sub>2</sub>R<sup>-/-</sup> mice.

### Down regulation of TGFβ isoforms and the downstream target proteins (Smads) in AT<sub>1</sub>R<sup>-/-</sup> and upregulation of AT<sub>1</sub>R, TGFβ<sub>1</sub> and TGFβ<sub>2</sub> during later stages of wound healing in the AT<sub>2</sub>R<sup>-/-</sup>

Although not completely characterized, all phases of wound healing appear to be greatly influenced by subtle

modulation of TGF-β, which is strongly influenced by RAS [6;7;30-32]. The three isoforms of TGF-β (β1, β2, and β3) signal through the same cell surface receptor, but appear to play distinct functions during wound healing. While TGF β1 and β2 have predominantly pro-scarring roles, TGF β3 have mainly anti-scarring effects [32]. RAS has been tightly linked to TGFβ activity but the specific effects of AT<sub>1</sub>R and AT<sub>2</sub>R on the different TGF isoforms are not known. Using qPCR we determined differences in expression of the three different isoforms of TGFβ in the healing skin (day 20) of our mouse cohorts. Our results demonstrate a significant decrease in all the three different isoforms of TGFβ in the wound of the AT<sub>1</sub>R<sup>-/-</sup> mice (*P*<0.05; Figure 3: panel A, B and C). TGF-β1 mRNA levels in AT<sub>1</sub>R<sup>-/-</sup> mice were decreased 7.69 fold as compared to WT mice. In contrast the TGFβ1 mRNA levels increased 1.83 fold in AT<sub>2</sub>R<sup>-/-</sup> mice as compared to WT mice (*P* < 0.005; Figure 3: panel A). The expression of TGFβ2 mRNA was also decreased 20 fold in AT<sub>1</sub>R<sup>-/-</sup> mice compared with WT mice (*P* < 0.005; Figure 2: panel B). TGFβ3 mRNA expression was decreased 7.1 fold in AT<sub>1</sub>R<sup>-/-</sup> mice in comparison with WT mice (*P* < 0.005; figure 2: panel C). *In contrast, we observed an increase only in TGFβ1 in AT<sub>2</sub>R<sup>-/-</sup>, compared to both WT control*

and  $AT_1R^{-/-}$  mice ( $p < 0.05$ ; Figure 3: panel A). We quantified changes in  $AT_1R$  and the three isoforms of TGF $\beta$  in days 0, 3, 7 and 9 of wound healing to investigate if the biphasic pattern observed in wound healing of the  $AT_2R^{-/-}$  corresponded to a stage dependent changes in  $AT_1R$  and to quantify changes in TGF- $\beta$  isoforms. Our results suggest that the expression of  $AT_1R$  was upregulated by day 7 of wound healing (2.18 and 2.56 fold change respectively,  $p < 0.05$ ; Figure 3: panel D). This increase corresponded to an increase in both TGF $\beta_1$  and TGF $\beta_2$  ( $p < 0.05$ ; Figure 3: panel E and F). No change in TGF $\beta_3$  was observed. Changes in  $AT_1R$  in different stages of wound healing strongly correlated with the changes in TGF $\beta_1$  (Pearson  $r = 0.99$ ,  $p = 0.04$ ).

Next we sought to determine the impact of the disruption of angiotensin receptors on the downstream target proteins of the TGF $\beta$  signaling pathway. TGF $\beta$  signals through Smad2 and Smad3 that are phosphorylated by TGF $\beta$  receptors and translocate to the nucleus with the common-mediator (co-Smad) Smad4 [33;34]. Our results

showed no significant difference in Smad2 in wounds of  $AT_1R^{-/-}$  or  $AT_2R^{-/-}$  mice as compared to WT mice (Figure 4). Consistent with the reduction in the three isoforms of TGF $\beta$ , we have observed a significant reduction in both Smad3 and the common-mediator Smad4 in wounds of  $AT_1R^{-/-}$  mice as compared with WT mice ( $P < 0.001$ , Figure 4). Our results also demonstrate reduction in phosphorylation of Smad2 and Smad3 only in wounds of  $AT_1R^{-/-}$  mice as compared with WT mice ( $P < 0.01$ , Figure 5). Interestingly, we have observed a similar decrease in Smad3 in  $AT_2R^{-/-}$  mice as compared to WT mice ( $P < 0.0001$ , Figure 4). There were no differences in Smad4, phospho-Smad2 or phospho-Smad3 in wounds of  $AT_2R^{-/-}$  mice.

### Reduced repair and proliferation activity in wounds of $AT_1R^{-/-}$ mice

The angiotensin receptors have been linked to changes in cell differentiation and proliferation. While  $AT_1R$  have been shown to increase cell proliferation,  $AT_2R$  have been shown critical for cell differentiation [12].

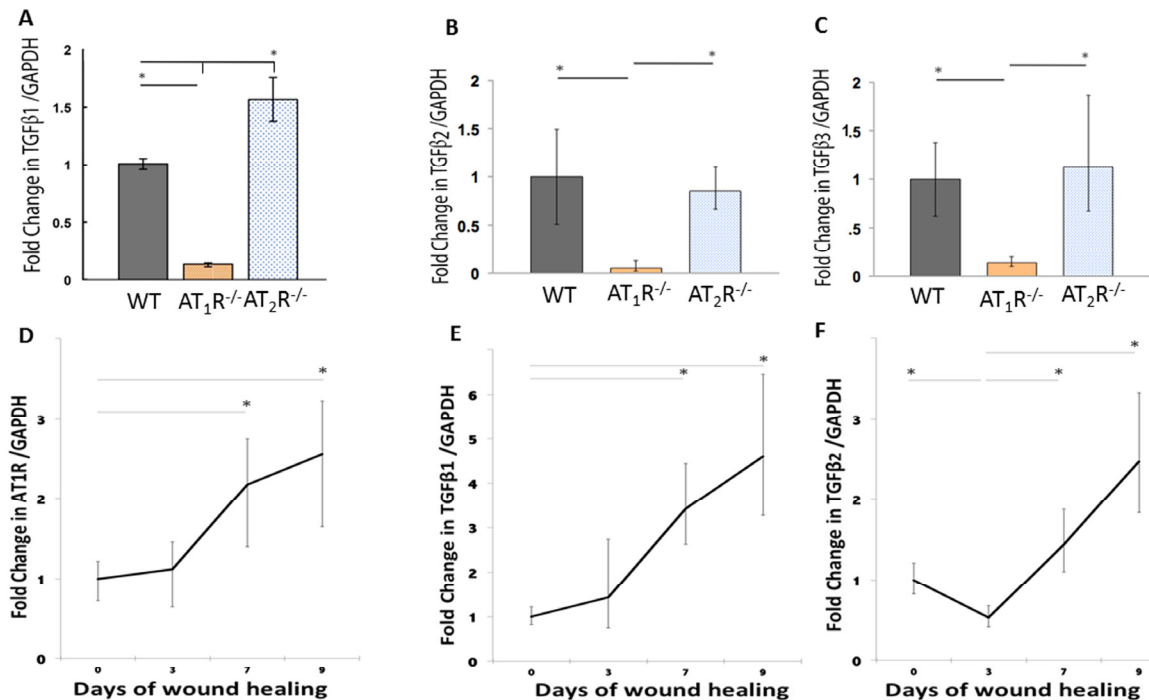

**Figure 3.** Altered expression of wound TGF $\beta$  isoforms in  $AT_1R^{-/-}$  and  $AT_2R^{-/-}$  mice.  $AT_1R^{-/-}$  mice have lower expression of TGF $\beta_1$  (A), TGF $\beta_2$  (B), and TGF $\beta_3$  (C) in healed skin (day20) as compared to WT and  $AT_2R^{-/-}$  mice. An increase in the expression of  $AT_1R$  (D), TGF $\beta_1$  (E), TGF $\beta_2$  (F) correlated with the accelerated healing rate observed in later stages of wound healing in  $AT_2R^{-/-}$  mice. The length of fold change error bar equal variance 95% confidence interval \* $p < 0.05$ .



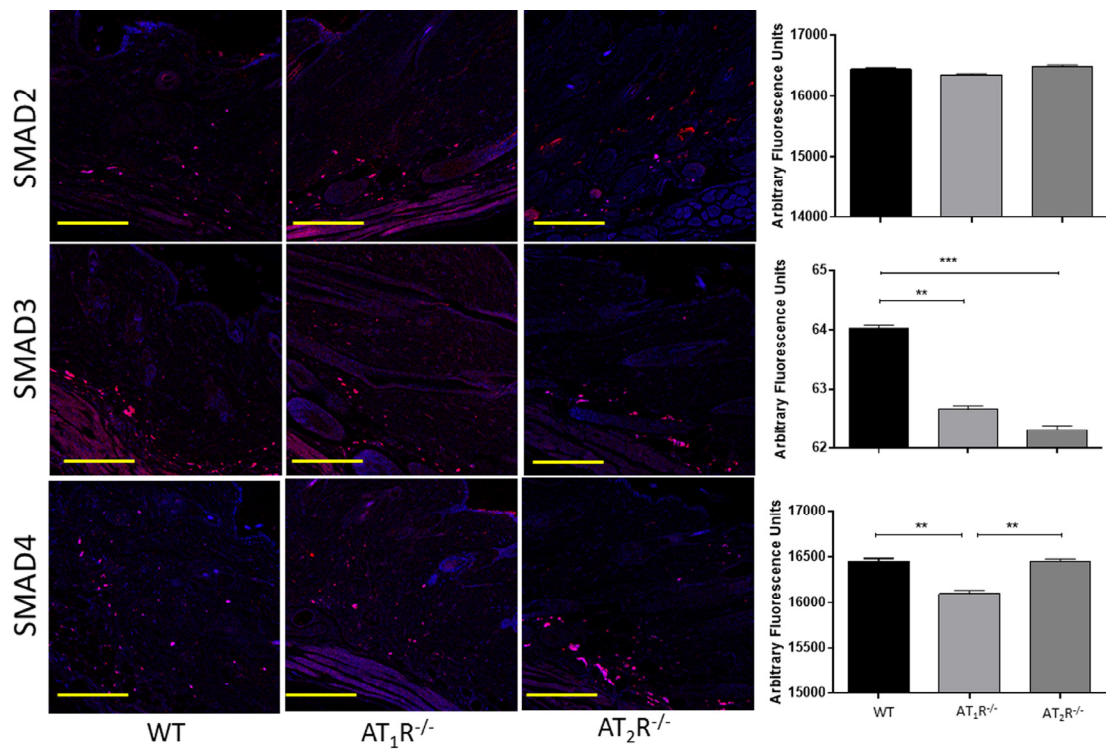

**Figure 4.** Changes in the TGF $\beta$  downstream signaling proteins in wounds of AT<sub>1</sub>R<sup>-/-</sup> and AT<sub>2</sub>R<sup>-/-</sup> mice. AT<sub>1</sub>R<sup>-/-</sup> mice have lower expression of Smad3 and the common mediator Smad4 in healed skin (day20) as compared to WT. A decrease in the expression of Smad3 was also observed in the AT<sub>2</sub>R<sup>-/-</sup> mice. The photomicrographs presented in red fluorescent staining with a blue DAPI counter stain for nuclei at 10x magnification. Quantification of mean fluorescence intensity of Smads in wild-type and mutant mice is shown. Scale bar 200  $\mu$ m. \*\*p<0.005, \*\*\*p<0.0005.

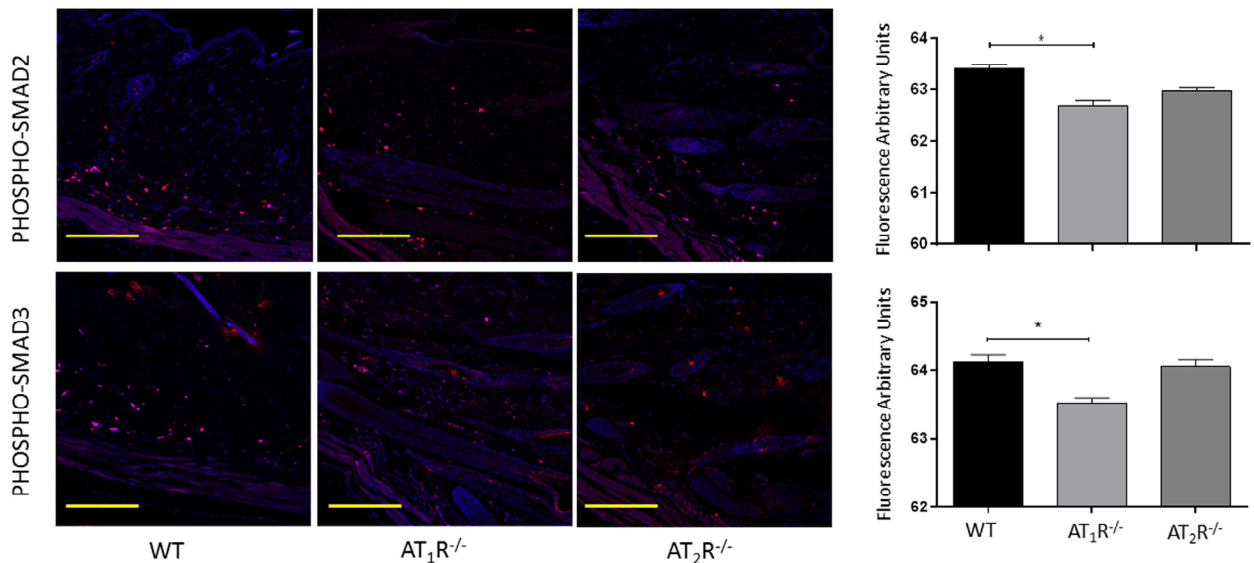

**Figure 5.** Changes in levels of phosphorylated TGF $\beta$  downstream signaling proteins in wounds of AT<sub>1</sub>R<sup>-/-</sup> and AT<sub>2</sub>R<sup>-/-</sup> mice. AT<sub>1</sub>R<sup>-/-</sup> mice have lower expression of Phospho-Smad2 and Phospho-Smad3 in healed skin (day20) as compared to WT. The photomicrographs presented in red fluorescent staining with a blue DAPI counter stain for nuclei at 10x magnification. Quantification of mean fluorescence intensity of phospho-Smads in wild-type and mutant mice is shown. Scale bar 200  $\mu$ m. \*p<0.05.

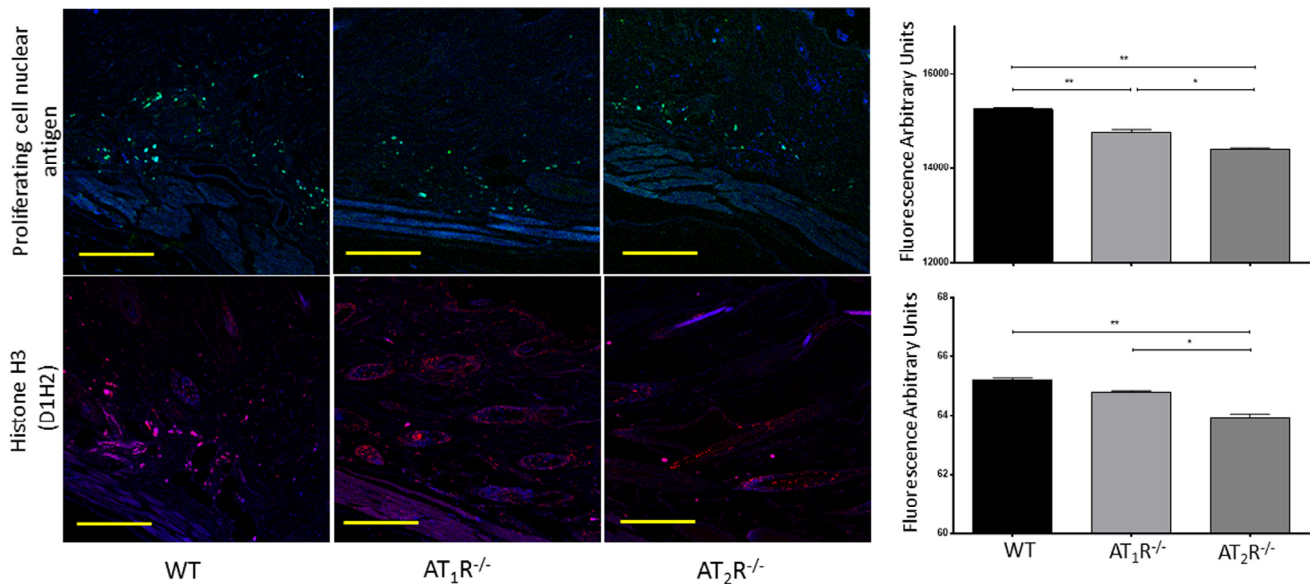

**Figure 6.** Down regulation of Proliferating Cell Nuclear Antigen in wounds of AT<sub>1</sub>R<sup>-/-</sup> and AT<sub>2</sub>R<sup>-/-</sup> mice. AT<sub>2</sub>R<sup>-/-</sup> mice have lower expression of total Histone H3 in healed skin (day20) as compared to WT. The photomicrographs presented in green (PCNA) or red (Total Histone H3) fluorescent staining with a blue DAPI counter stain for nuclei at 10x magnification. Quantification of mean fluorescence intensity of PCNA and Histone H3 in wild-type and mutant mice is shown. Scale bar 200 μm. \*p<0.05, \*\*p<0.005 .

Given the observed delayed wound healing noted in AT<sub>1</sub>R<sup>-/-</sup> mice, we wanted to determine if this delay was driven by changes in cellular proliferative activity. We quantified changes in Proliferating cell nuclear antigen (PCNA), a nuclear protein essential for DNA replication and repair and is a marker for cellular growth and proliferation. To further investigate the mitotic activity at the wound site, we studied expression levels of the phosphorylated form of the histone protein H3. Histone H3 phosphorylation is linked to cells that are actively dividing. Consistent with the delayed healing rate in AT<sub>1</sub>R<sup>-/-</sup> mice, we have observed a significant reduction in PCNA (P<0.005, Figure 6) and in mitotic histone H3 phosphorylation at several residues, including serines 28 (P<0.005) as well as threonines 3 (0.005) and 11(0.05) (Figure 7). Surprisingly, we have observed a similar decrease in PCNA and phosphorylation of Histone 3 Threonine 3 residue in AT<sub>2</sub>R<sup>-/-</sup> mice. The impact of the differential phosphorylation of certain histone H3 residues in AT<sub>2</sub>R<sup>-/-</sup> mice on wound healing activity and scar quality is currently unclear.

#### Tensiometry shows wound fragility in AT<sub>2</sub>R<sup>-/-</sup> mice

Given the pro-scarring and fibrotic effects of TGFβ1, we next sought to determine if there was a difference in

the healed skin's physical characteristics (Peak force, total work and compliance). Our results show that despite the accelerated healing rate observed in the AT<sub>2</sub>R<sup>-/-</sup> mice, the healed skin in the AT<sub>2</sub>R<sup>-/-</sup> mice was more fragile, fracturing more easily (Panel 8B), being more compliant (Panel 8C), and breaking with less work (Panel 8D) than wounds from AT<sub>1</sub>R<sup>-/-</sup> or WT mice. (P<0.05). Masson's trichrome staining of healing skin shows increase of subcutaneous fat in both AT<sub>1</sub>R<sup>-/-</sup> and AT<sub>2</sub>R<sup>-/-</sup>. A reduction in dermal collagen zone in AT<sub>1</sub>R<sup>-/-</sup> was also observed (Figure 9).

## DISCUSSION

Several lines of evidence suggest that increased RAS activity through the AT<sub>1</sub>R plays a crucial role in wound healing [5-9]. Our results further dissects the impact of angiotensin receptors on wound healing. AT<sub>2</sub>R antagonizes inflammatory signaling, a necessary activating function that leads to the proliferation phase. The lack of AT<sub>2</sub>R was associated with a slower closure rate during the early stages. This may have resulted from an unopposed pro-inflammatory AT<sub>1</sub>R, causing delayed resolution of the inflammatory phase and impairing the transition to the proliferative and remodeling phases [1-4;35].

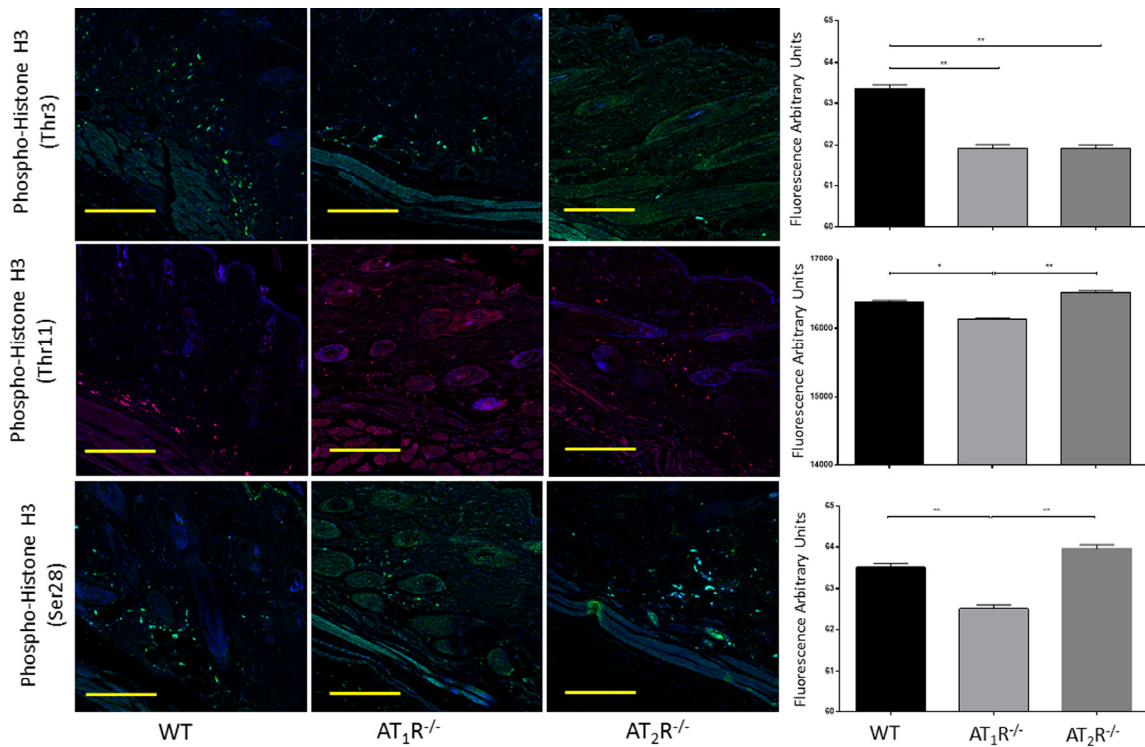

**Figure 7.** Down regulation of mitotic histone H3 phosphorylation in wounds of AT<sub>1</sub>R<sup>-/-</sup> at several residues, including serine 28 as well as threonine 3 and 11. AT<sub>2</sub>R<sup>-/-</sup> mice have lower expression of Phospho-Histone H3 (Thr3) in healed skin (day20) as compared to WT. The photomicrographs presented in green (Thr3 and S28) or red (Thr11) fluorescent staining with a blue DAPI counter stain for nuclei at 10x magnification. Quantification of mean fluorescence intensity of Phospho-Histone H3 in wild-type and mutant mice is shown. Scale bar 200  $\mu$ m. \* $p$ <0.05, \*\* $p$ <0.005.

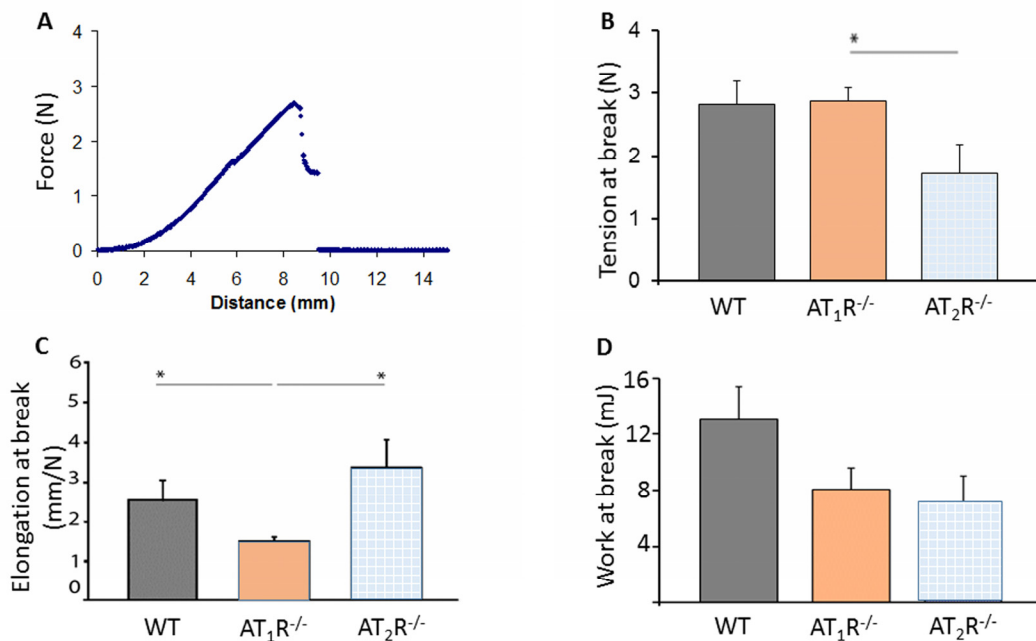

**Figure 8.** Biomechanical assessment of healed skin in WT, AT<sub>1</sub>R<sup>-/-</sup> and AT<sub>2</sub>R<sup>-/-</sup> mouse cohorts. (A) Sample representation of tension–elongation curve. (B) Comparison of the average tension at the breaking point of mice groups (mean  $\pm$  SEM,  $n = 10$ ; \* $P < 0.05$ , Mann–Whitney analysis). (C) Average elongation at the breaking point of both groups (\* $P < 0.05$ , t-test). (D) Average work at the breaking point of both groups (calculated from the integral of the curve; \* $P < 0.05$ , Mann–Whitney analysis).



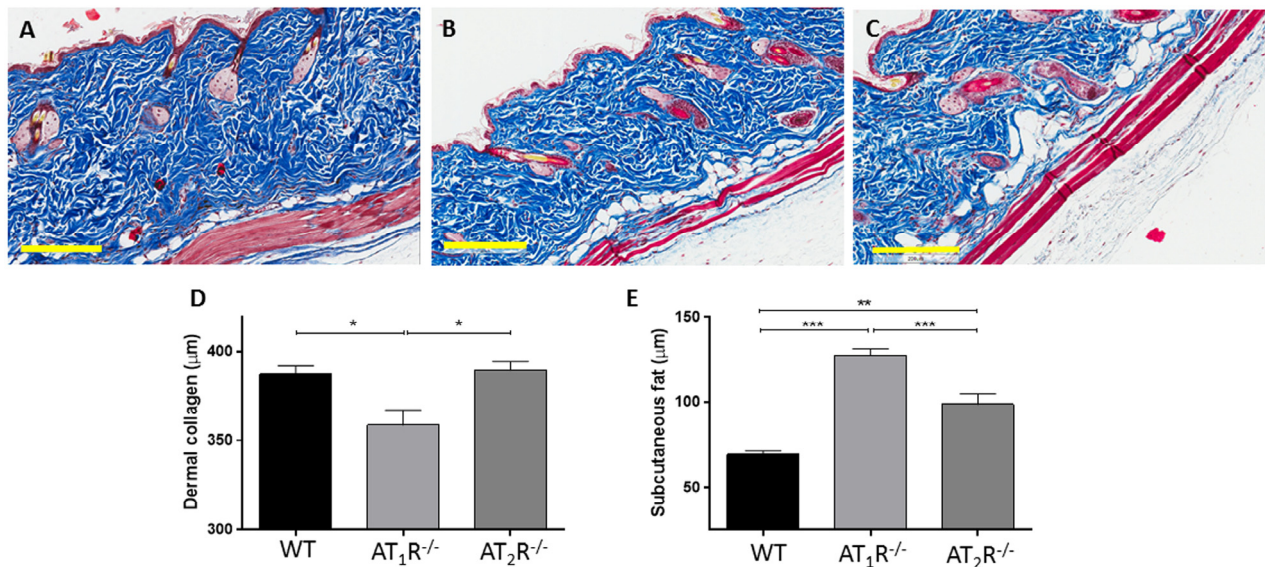

**Figure 9.** Masson's trichrome staining of skin sections from WT (A),  $AT_1R^{-/-}$  (B) and  $AT_2R^{-/-}$  (C) mouse cohorts shows an expanded zone of subcutaneous fat in the angiotensin knockout mice. Quantification of the thickness of the zones of dermal collagen and subcutaneous fat in wild-type and mutant mice is shown. Scale bar 200  $\mu\text{m}$ . \* $p < 0.05$ , \*\* $p < 0.005$ , \*\*\* $p < 0.0005$ .

We have observed a delayed healing pattern in  $AT_1R^{-/-}$  throughout all phases of wound healing, which is consistent with the pro-inflammatory and pro-proliferative characteristics of  $AT_1R$  [12], and is in agreement with previous reports [11]. This is also supported with the significant reduction in both PCNA and phospho-Histone H3 in healing skin of the  $AT_1R^{-/-}$  mice. In contrast, by day 8 in  $AT_2R^{-/-}$  mice, as the healing wounds were transitioning to the proliferative phase we observed a significant upregulation of wound  $AT_1R$  along with an accelerated rate of healing. Our combined results of accelerated healing with the upregulation of  $AT_1R$  (in  $AT_2R^{-/-}$  mice), contrasted with delayed healing in  $AT_1R^{-/-}$  may suggest phase-dependent role for increased  $AT_1R$  signaling during the proliferative phase through alterations in TGF- $\beta$  signaling and alterations in the extracellular matrix [30;36;37].

The relationship between the TGF $\beta$  family and angiotensin receptors is not entirely mapped out and remains mechanistically vague. Previous studies have reported that RAS activation through  $AT_1R$  increases TGF $\beta$  signaling [38;39]. Our results demonstrate a significant down regulation of all the three isoforms of TGF $\beta$  and the downstream targeting proteins Smad3, Smad4, as well as the phospho-Smad2 and phospho-

Smad3 in the  $AT_1R^{-/-}$  mice. The impact of TGF $\beta$  on cutaneous wound healing has been well established. The release of TGF $\beta_1$  during early stages of healing prompts the expression of key components such as fibronectin, collagen types I and III, and VEGF [32]. Additionally, TGF $\beta_1$  improves angiogenesis to facilitate blood supply to the injured site [40] which then stimulates fibroblasts to allow for wound closure [41]. Whether the decrease in TGF $\beta_1$  is causal of the impaired wound healing in the  $AT_1R^{-/-}$  mice is not known. However, in  $AT_2R^{-/-}$  mice there was a strong, positive correlation between dermal TGF $\beta_1$  and  $AT_1R$  expression in later stages of wound healing that corresponded to an accelerated wound closure. This is in agreement with previous reports linking  $AT_1R$  stimulation to increased TGF $\beta_1$  expression and collagen maturation [42] and may potentially explain the decreased compliance seen in healed skin in  $AT_1R^{-/-}$  mice.

Similarly, the second isoform TGF $\beta_2$ , is involved in granulation tissue formation, angiogenesis and collagen synthesis [43;44]. Impaired wound healing has been demonstrated in TGF $\beta_2$  transgenic mice [45]. In  $AT_2R^{-/-}$  mice, we observed a decrease in the expression of TGF $\beta_2$  by day 3 of wound healing. This initial drop corresponded to the impaired healing seen in early phases in  $AT_2R^{-/-}$  mice. Furthermore, we have observed



a significant increase in TGF $\beta$ <sub>2</sub> by day 7 that was matched with a faster healing rate.

The lack of change in TGF $\beta$ <sub>3</sub> and blood flow in *AT<sub>2</sub>R*<sup>-/-</sup> mice may suggest that these two factors do not play a significant role in modulating wound healing in response to the knocking out of the *AT<sub>2</sub>R*.

Changes in the TGF $\beta$  downstream signaling proteins (Smads) have been linked to the rate of wound healing. The down regulation of Smad3 have been linked to acceleration of wound closure [46]. In contrast, the knockdown of Smad4 was associated with aberrant wound healing [47]. Consistent with previous reports on the role of Smad3, we have noted the lowest level of Smad3 in *AT<sub>2</sub>R*<sup>-/-</sup> along with the fastest wound closure rate. The down regulation of Smad4 in *AT<sub>1</sub>R*<sup>-/-</sup> may have played a role in the delayed healing rate.

In summary, the silencing of *AT<sub>1</sub>R* delayed wound healing, while the interruption of *AT<sub>2</sub>R* accelerated wound healing. Furthermore, this effect in *AT<sub>2</sub>R*<sup>-/-</sup> mice, was at least partially mediated by *AT<sub>1</sub>R*, TGF $\beta$ <sub>1</sub> and TGF $\beta$ <sub>2</sub>. This data supports the notion of the antagonistic interaction between *AT<sub>1</sub>R* and *AT<sub>2</sub>R*.

Mitochondria provide energy and produce reactive oxygen species to drive the increased mitotic and synthetic activity necessary for wound healing. Several groups demonstrated a link between age-related mitochondrial dysfunction and impaired wound healing [48]. The identification of a functional intra-mitochondrial angiotensin system (MAS) [49] may provide additional insight into the RAS interface with wound healing. Activation of the intra-mitochondrial *AT<sub>2</sub>R* is coupled to increased nitric oxide generation and inhibition of mitochondrial energy production [49]. Further work is needed to determine the impact of MAS on wound healing.

There are several limitations to our current study. Structurally, mice skin differs from human skin in that mice have much thinner epidermal and dermal layers than humans. Furthermore, mice also have a large subcutaneous muscle layer, which augments wound repair by contraction making further studies in a second animal model (pigs) or humans necessary before extrapolating results to humans. Also, given that we are studying mice that are homozygote knockouts for either the *AT<sub>1</sub>R* or the *AT<sub>2</sub>R*, partial effects of the genes and the compensatory effects of one angiotensin receptor on the absence of the other receptor are still not clear.

Given the effects of aging on angiotensin receptors [12;49;50], and that many aged, frail individuals are

already on angiotensin receptor blockers, this research highlights the crosstalk between *AT<sub>1</sub>R* and *AT<sub>2</sub>R* and that pinpointing the exact molecular changes in angiotensin receptors and the impact of angiotensin receptor blockers on wound healing in aged individuals is important for the progression of the field of wound healing.

## METHODS

Mouse models. This study was approved by the Johns Hopkins Animal Care and Use Committee (ACUC). To ascertain the influence of angiotensin receptors on wound healing, downstream effectors and healed skin quality, we compared 28-week old male C57BL/6J wild type (WT) mice (Jackson Laboratories, Bar Harbor, Maine) to age and gender matched *AT<sub>1</sub>R* knockout (*AT<sub>1</sub>R*<sup>-/-</sup>) (Jackson Laboratories, Bar Harbor, Maine) [13] and *AT<sub>2</sub>R* knockout (*AT<sub>2</sub>R*<sup>-/-</sup>) mice (supplied by our collaborator Dr. Tedashi Inagami, Vanderbilt University, TN) [14;15]. Male mice were employed to avoid the effects of hormonal changes on wound blood flow and healing.

Wounding procedure and area calculation. Mice (N=10 in each group) were anesthetized by a mobile RC<sup>2</sup> non-rebreathing anesthesia machine (Vet Equip, Inc. Pleasanton, CA). Buprenorphine (1 mg/kg) was administered by a subcutaneous injection during the first 24 hours. A full thickness 8 mm wound was created by punch biopsy. On days 0, 3, 5, 7, 9, 11 and 13, the wound borders were traced *in situ* onto clear acetate paper. Images were digitized at 600 dpi (Hewlett Packard Company, Laser Jet 3390, Palo Alto). Wound areas (in pixels) were calculated using Adobe Photoshop CS3 Image software (Adobe System Inc. San Jose, CA). Wound area on day 0 was taken as a 100% and a wound size ratio obtained with that measurement in each time point. The wounds were checked daily after day 10 until complete closure.

Laser Doppler Perfusion Imaging (LDPI). Blood flow in the wound areas was measured at days 7 and 11 using a 633 nm, He-Ne scanning laser Doppler imaging device (Moor Instruments, Devon, UK), which utilizes a near-infrared laser diode to measure subcutaneous blood flow as a function of light scattering by moving red blood cells (Doppler shift), as described previously [16].

Physical measurements of tissue strength. Peak force, work to rupture and flexibility of healed skin were calculated at day 21 using a FGV-10XY tensiometer (Checkline by Electromatic, Cedarhurst, NY) to record the force generated as the skin was elongated until rupture as described previously [17].

**Histology/Immunofluorescence.** Healing skin tissues were embedded in Tissue-Tek O.C.T. Compound (Sakura) and multiple thin sections (5  $\mu$ m) were cut using a cryostat (Microm). Subsequently, the sections were stained with Masson's Trichrome (Polysciences, Inc.) or using immunofluorescence techniques. Masson's Trichrome staining was carried out according to the manufacturer protocol with the addition of an one hour 10% formalin fix at room temperature (RT) prior to the fixation in Bouin's solution (Meinen 2011). Slides were then digitally scanned and under high-power fields both dermal and subcutaneous fat thicknesses were measured [18] using Aperio ImageScope software (Leica Biosystems, Germany). For immunostaining, the sections were fixed with 4% paraformaldehyde for 15 minutes at RT then blocked with 5% BSA/0.3% TritonX-100/PBS for one hour at RT, incubated with the primary antibodies, overnight at 4°C. For the TGF $\beta$  signaling cascade, the following antibodies were purchased commercially: anti- Smad2 (D43B4) rabbit mAb (1:100 dilution, Cat#5339) [19], anti- Smad2/3 (D7G7) Rabbit mAb (1:100 dilution, Cat# 8685) [20], anti- Smad3 (C67H9) rabbit mAb (1:100 dilution, Cat# 9523) [21], anti- Smad4 (cat#9515) [22], anti-Phospho-Smad2 (Ser465/467) (138D4) rabbit mAb (1:100 dilution, cat#3108) [23], and anti-phospho-Smad3 (Ser423/425) (C25A9) rabbit mAb (1:100 dilution, Cat#9520) [24] from Cell Signaling Technology, Beverly, MA. For cell proliferation activity, the following antibodies were purchased commercially: anti- Proliferating cell nuclear antigen (PCNA) PCNA (1:2400 dilution, cat# #8607) [25], anti- Histone H3 (D1H2) rabbit mAb (1:100 dilution, Cat#4499) [26], anti-phospho-Histone H3 (Thr3) (cat#9714) [ 27]; anti- phospho-Histone H3 (Thr11) (cat#9764) [ 28], anti- phospho-Histone H3 (Ser28) (1:100 dilution, cat# 9713) [29] from Cell Signaling Technology, Beverly, MA. Sections were then incubated with secondary IgG (H+L), F(ab')<sub>2</sub> Fragment (Alexa Fluor® 555 Conjugate, (1:1000 dilution, Cat #44091) at RT for 1 hour. Slides were mounted with Vectashield Hard Set with Dapi (Vector Laboratories). All images were taken at 10x, 0.3 NA, PlanNeoflaur on the Zeiss LSM 700. Imaging and quantification were done by the JHU microscope facility by blinded examiners. Automated quantification of mean intensity of fluorescent signal were done using Volocity image analysis software (v6.3, Perkin Elmer, Waltham, Massachusetts).

**Quantitative real-time reverse transcription PCR.** Total RNA was extracted from half of each wound sample using TRIzol (Invitrogen, Frederick, MD, USA), RNeasy Kit (QIAGEN, Redwood City, CA, USA), based on the manufacturer's protocol. Single-stranded

cDNA is synthesized using iScript cDNA Synthesis Kit (Bio-Rad, Hercules, CA, USA). The fold changes in TGF- $\beta$  1 (primer sequence: Fwd: 5'GAGCCCGAAGCGGACTACTA 3'; Rev: 5'CCCGAATGTCTGACGTATTGAAG 3'), TGF- $\beta$  2 (primer sequence: Fwd: 5'AGAATCGTCCGCTTTGATGTC 3'; Rev: 5'TCTGGTTTTTACAACCTTGCT 3'), TGF- $\beta$  3 (primer sequence: Fwd: 5' CAGGCCAGGGTAGTCAGAG 3'; Rev: 5' ATTTCCAGCCTAGATCCTGCC 3') gene expression of healed tissue samples was normalized to Glyceraldehyde-3-phosphate dehydrogenase (GAPDH) using the threshold cycle for amplification as  $2^{-\Delta\Delta C_T}$ , where as  $\Delta\Delta C_T = \Delta C_{T,control} - \Delta C_{T,target}$ . Real-time PCR was performed using Brilliant II SYBR Green QPCR Master Mix (Agilent Technologies, Santa Clara, CA, USA) and Agilent Mx3000P QPCR Systems (Agilent Technologies, Santa Clara, CA, USA).

**Statistical analysis.** Data were presented as mean  $\pm$  SEM. Differences in means between groups were analyzed for significance using two-way analysis of variance, followed by Holm-Sidak post hoc analysis when appropriate. Complete closure rate as a final outcome, was assessed with the Kaplan-Meier method, using Gehan-Breslow test to determine differences. Student's t-test and Mann-Whitney test were also used to analyze the biomechanical tensiometry data. A probability value of <0.05 was considered statistically significant.

## Funding

This study was supported by the Johns Hopkins Older Americans Independence Center National Institute on Aging Grant P30 AG021334, National Institute on Aging Grants 1R01AG046441 and K23 AG035005, Nathan Shock in Aging Scholarship Award (PMA), R21AG043284 (JW and PMA), the Wound healing society foundation 3M scholarship(PMA) , NIH research grant HL58205 (TI) and NIH grant S10 OD016374 (microscope Facility).

## Author contributions

Mahya Faghieh- PCR measurement of angiotensin receptors and TGF $\beta$ ; drafting of the manuscript; critical revision of the manuscript for important intellectual content.

Sayed Mohammad Hosseini- performance of animal experiments, acquisition of data, critical revision of the manuscript for important intellectual content.

Amir Mehdi Ansari- acquisition of data, critical revision of the manuscript for important intellectual content.

Barbara Smith- IHC staining and quantification of

SMADs and wound healing markers. Drafting of the manuscript; critical revision of the manuscript for important intellectual content.

Frank Lay- acquisition of data, critical revision of the manuscript for important intellectual content.

Tedashi Inagami: provided the AT<sub>2</sub>R<sup>-/-</sup> mice. Study concept and design; critical revision of the manuscript for important intellectual content.

Guy Marti- provided expertise regarding the animal model and the methods for assessing wound healing including planimetry, laser Doppler perfusion imaging of blood flow and assessment of biodynamic characteristics of the skin with tensiometry. Critical revision of the manuscript for important intellectual content.

John W. Harmon- provided expertise regarding the animal model and the methods for assessing wound healing including planimetry, laser Doppler perfusion imaging of blood flow and assessment of biodynamic characteristics of the skin with tensiometry. Critical revision of the manuscript for important intellectual content.

Jeremy D. Walston - study concept and design; critical revision of the manuscript for important intellectual content.

Peter Abadir- study concept and design; acquisition of data; analysis and interpretation of data; drafting of the manuscript; critical revision of the manuscript for important intellectual content; administrative, technical, and material support; study supervision.

### Conflict of interest statement

The authors declare no conflict of interests.

### REFERENCES

1. Scimeca CL, Bharara M, Fisher TK, Kimbriel H, Mills JL, Armstrong DG: An update on pharmacological interventions for diabetic foot ulcers. *Foot Ankle Spec* 2010;3:285-302.
2. Pradhan L, Nabzdyk C, Andersen ND, LoGerfo FW, Veves A: Inflammation and neuropeptides: the connection in diabetic wound healing. *Expert Rev Mol Med* 2009;11:e2.
3. Falanga V: Wound healing and its impairment in the diabetic foot. *Lancet* 2005;366:1736-1743.
4. Stadelmann WK, Digenis AG, Tobin GR: Physiology and healing dynamics of chronic cutaneous wounds. *Am J Surg* 1998;176:265-385.
5. Hao SY, Ren M, Yang C, Lin DZ, Chen LH, Zhu P, Cheng H, Yan L: Activation of skin renin-angiotensin system in diabetic rats. *Endocrine* 2011;39:242-250.
6. Steckelings UM, Wollschlaeger T, Peters J, Henz BM, Hermes B, Artuc M: Human skin: source of and target organ for angiotensin II. *Exp Dermatol* 2004;13:148-154.
7. Yevdokimova N, Podpryatov S: The up-regulation of angiotensin II receptor type 1 and connective tissue growth factor are involved in high-glucose-induced fibronectin

production by cultured human dermal fibroblasts. *J Dermatol Sci* 2007;47:127-139.

8. Cooper ME: The role of the renin-angiotensin-aldosterone system in diabetes and its vascular complications. *Am J Hypertens* 2004;17:165-205.

9. Rodgers K, Verco S, Bolton L, diZerega G: Accelerated healing of diabetic wounds by NorLeu(3)-angiotensin (1-7). *Expert Opin Investig Drugs* 2011;20:1575-1581.

10. Abadir PM, Foster DB, Crow M, Cooke CA, Rucker JJ, Jain A, Smith BJ, Burks TN, Cohn RD, Fedarko NS, Carey RM, O'Rourke B, Walston JD: Identification and characterization of a functional mitochondrial angiotensin system. *Proc Natl Acad Sci U S A* 2011;108:14849-14854.

11. Yahata Y, Shirakata Y, Tokumaru S, Yang L, Dai X, Tohyama M, Tsuda T, Sayama K, Iwai M, Horiuchi M, Hashimoto K: A novel function of angiotensin II in skin wound healing. Induction of fibroblast and keratinocyte migration by angiotensin II via heparin-binding epidermal growth factor (EGF)-like growth factor-mediated EGF receptor transactivation. *J Biol Chem* 2006;281:13209-13216.

12. Vajapey R, Rini D, Walston J, Abadir P: The impact of age-related dysregulation of the angiotensin system on mitochondrial redox balance. *Front Physiol* 2014;5:439.

13. Ito M, Oliverio MI, Mannon PJ, Best CF, Maeda N, Smithies O, Coffman TM: Regulation of blood pressure by the type 1A angiotensin II receptor gene. *Proc Natl Acad Sci U S A* 1995;92:3521-3525.

14. Ichiki T, Labosky PA, Shiota C, Okuyama S, Imagawa Y, Fogo A, Niimura F, Ichikawa I, Hogan BL, Inagami T: Effects on blood pressure and exploratory behaviour of mice lacking angiotensin II type-2 receptor. *Nature* 1995;377:748-750.

15. Tanaka M, Tsuchida S, Imai T, Fujii N, Miyazaki H, Ichiki T, Naruse M, Inagami T: Vascular response to angiotensin II is exaggerated through an upregulation of AT1 receptor in AT2 knockout mice. *Biochem Biophys Res Commun* 1999;258:194-198.

16. Zhang X, Wei X, Liu L, Marti GP, Ghanamah MS, Arshad MJ, Strom L, Spence R, Jeng J, Milner S, Harmon JW, Semenza GL: Association of increasing burn severity in mice with delayed mobilization of circulating angiogenic cells. *Arch Surg* 2010;145:259-266.

17. Dou C, Lay F, Ansari AM, Rees DJ, Ahmed AK, Kovbasnjuk O, Matsangos AE, Du J, Hosseini SM, Steenbergen C, Fox-Talbot K, Tabor AT, Williams JA, Liu L, Marti GP, Harmon JW: Strengthening the skin with topical delivery of keratinocyte growth factor-1 using a novel DNA plasmid. *Mol Ther* 2014;22:752-761.

18. Castelino FV, Seiders J, Bain G, Brooks SF, King CD, Swaney JS, Lorrain DS, Chun J, Luster AD, Tager AM: Amelioration of dermal fibrosis by genetic deletion or pharmacologic antagonism of lysophosphatidic acid receptor 1 in a mouse model of scleroderma. *Arthritis Rheum* 2011;63:1405-1415.

19. Tamiya T, Ichiyama K, Kotani H, Fukaya T, Sekiya T, Shichita T, Honma K, Yui K, Matsuyama T, Nakao T, Fukuyama S, Inoue H, Nomura M, Yoshimura A: Smad2/3 and IRF4 play a cooperative role in IL-9-producing T cell induction. *J Immunol* 2013;191:2360-2371.

20. Loeys BL, Chen J, Neptune ER, Judge DP, Podowski M, Holm T, Meyers J, Leitch CC, Katsanis N, Sharifi N, Xu FL, Myers LA, Spevak PJ, Cameron DE, De BJ, Hellemans J, Chen Y, Davis EC, Webb CL, Kress W, Coucke P, Rifkin DB, De Paepe AM, Dietz HC:



A syndrome of altered cardiovascular, craniofacial, neurocognitive and skeletal development caused by mutations in TGFBR1 or TGFBR2. *Nat Genet* 2005;37:275-281.

**21.** Louafi F, Martinez-Nunez RT, Sanchez-Elsner T: MicroRNA-155 targets SMAD2 and modulates the response of macrophages to transforming growth factor- $\beta$ . *J Biol Chem* 2010;285:41328-41336.

**22.** Wang J, Wang Y, Wang Y, Ma Y, Lan Y, Yang X: Transforming growth factor  $\beta$ -regulated microRNA-29a promotes angiogenesis through targeting the phosphatase and tensin homolog in endothelium. *J Biol Chem* 2013;288:10418-10426.

**23.** Kong B, Michalski CW, Hong X, Valkovskaya N, Rieder S, Abiatari I, Streit S, Erkan M, Esposito I, Friess H, Kleeff J: AZGP1 is a tumor suppressor in pancreatic cancer inducing mesenchymal-to-epithelial transdifferentiation by inhibiting TGF- $\beta$ -mediated ERK signaling. *Oncogene* 2010;29:5146-5158.

**24.** Bergstrom R, Savary K, Moren A, Guibert S, Heldin CH, Ohlsson R, Moustakas A: Transforming growth factor  $\beta$  promotes complexes between Smad proteins and the CCCTC-binding factor on the H19 imprinting control region chromatin. *J Biol Chem* 2010;285:19727-19737.

**25.** Wang SC, Nakajima Y, Yu YL, Xia W, Chen CT, Yang CC, McIntush EW, Li LY, Hawke DH, Kobayashi R, Hung MC: Tyrosine phosphorylation controls PCNA function through protein stability. *Nat Cell Biol* 2006;8:1359-1368.

**26.** Wang H, Cheng F, Woan K, Sahakian E, Merino O, Rock-Klotz J, Vicente-Suarez I, Pinilla-Ibarz J, Wright KL, Seto E, Bhalla K, Villagra A, Sotomayor EM: Histone deacetylase inhibitor LAQ824 augments inflammatory responses in macrophages through transcriptional regulation of IL-10. *J Immunol* 2011;186:3986-3996.

**27.** Goto H, Tomono Y, Ajiro K, Kosako H, Fujita M, Sakurai M, Okawa K, Iwamatsu A, Okigaki T, Takahashi T, Inagaki M: Identification of a novel phosphorylation site on histone H3 coupled with mitotic chromosome condensation. *J Biol Chem* 1999;274:25543-25549.

**28.** Sayegh J, Cao J, Zou MR, Morales A, Blair LP, Norcia M, Hoyer D, Tackett AJ, Merkel JS, Yan Q: Identification of small molecule inhibitors of Jumonji AT-rich interactive domain 1B (JARID1B) histone demethylase by a sensitive high throughput screen. *J Biol Chem* 2013;288:9408-9417.

**29.** Sakabe K, Hart GW: O-GlcNAc transferase regulates mitotic chromatin dynamics. *J Biol Chem* 2010;285:34460-34468.

**30.** Roberts AB, Flanders KC, Kondaiah P, Thompson NL, Van Obberghen-Schilling E, Wakefield L, Rossi P, de CB, Heine U, Sporn MB: Transforming growth factor  $\beta$ : biochemistry and roles in embryogenesis, tissue repair and remodeling, and carcinogenesis. *Recent Prog Horm Res* 1988;44:157-197.

**31.** Crowe MJ, Doetschman T, Greenhalgh DG: Delayed wound healing in immunodeficient TGF- $\beta$  1 knockout mice. *J Invest Dermatol* 2000;115:3-11.

**32.** Finnson KW, McLean S, Di Guglielmo GM, Philip A: Dynamics of Transforming Growth Factor  $\beta$  Signaling in Wound Healing and Scarring. *Adv Wound Care (New Rochelle)* 2013;2:195-214.

**33.** Moustakas A, Heldin CH: The regulation of TGF $\beta$  signal transduction. *Development* 2009;136:3699-3714.

**34.** Bergstrom R, Savary K, Moren A, Guibert S, Heldin CH, Ohlsson R, Moustakas A: Transforming growth factor  $\beta$  promotes complexes between Smad proteins and the CCCTC-binding factor on the H19 imprinting control region chromatin. *J Biol Chem* 2010;285:19727-19737.

**35.** Van de Kerkhof PC, Van BB, Spruijt K, Kuiper JP: Age-related changes in wound healing. *Clin Exp Dermatol* 1994;19:369-374.

**36.** Mauviel A: Transforming growth factor- $\beta$  signaling in skin: stromal to epithelial cross-talk. *J Invest Dermatol* 2009;129:7-9.

**37.** Denton CP, Khan K, Hoyles RK, Shiwen X, Leoni P, Chen Y, Eastwood M, Abraham DJ: Inducible lineage-specific deletion of T $\beta$ RII in fibroblasts defines a pivotal regulatory role during adult skin wound healing. *J Invest Dermatol* 2009;129:194-204.

**38.** Burks TN, Andres-Mateos E, Marx R, Mejias R, Van EC, Simmers JL, Walston JD, Ward CW, Cohn RD: Losartan restores skeletal muscle remodeling and protects against disuse atrophy in sarcopenia. *Sci Transl Med* 2011;3:82ra37.

**39.** Fukami K, Ueda S, Yamagishi S, Kato S, Inagaki Y, Takeuchi M, Motomiya Y, Bucala R, Iida S, Tamaki K, Imaizumi T, Cooper ME, Okuda S: AGEs activate mesangial TGF- $\beta$ -Smad signaling via an angiotensin II type I receptor interaction. *Kidney Int* 2004;66:2137-2147.

**40.** Ferrari G, Cook BD, Terushkin V, Pintucci G, Mignatti P: Transforming growth factor- $\beta$  1 (TGF- $\beta$ 1) induces angiogenesis through vascular endothelial growth factor (VEGF)-mediated apoptosis. *J Cell Physiol* 2009;219:449-458.

**41.** El GH, Elbardisey DM, Eltokhy HM, Teaama D: Effect of transforming growth factor  $\beta$  1 on wound healing in induced diabetic rats. *Int J Health Sci (Qassim)* 2013;7:160-172.

**42.** Sakai N, Wada T, Matsushima K, Bucala R, Iwai M, Horiuchi M, Kaneko S: The renin-angiotensin system contributes to renal fibrosis through regulation of fibrocytes. *J Hypertens* 2008;26:780-790.

**43.** Shah M, Foreman DM, Ferguson MW: Neutralisation of TGF- $\beta$  1 and TGF- $\beta$  2 or exogenous addition of TGF- $\beta$  3 to cutaneous rat wounds reduces scarring. *J Cell Sci* 1995; 108:985-1002.

**44.** Miller MC, Nanchahal J: Advances in the modulation of cutaneous wound healing and scarring. *BioDrugs* 2005;19:363-381.

**45.** Pakyari M, Farrokhi A, Maharlooei MK, Ghahary A: Critical Role of Transforming Growth Factor  $\beta$  in Different Phases of Wound Healing. *Adv Wound Care (New Rochelle)* 2013;2:215-224.

**46.** Ashcroft GS, Yang X, Glick AB, Weinstein M, Letterio JL, Mizel DE, Anzano M, Greenwell-Wild T, Wahl SM, Deng C, Roberts AB: Mice lacking Smad3 show accelerated wound healing and an impaired local inflammatory response. *Nat Cell Biol* 1999;1:260-266.

**47.** Owens P, Engelking E, Han G, Haeger SM, Wang XJ: Epidermal Smad4 deletion results in aberrant wound healing. *Am J Pathol* 2010;176:122-133.

**48.** Gould L, Abadir P, Brem H, Carter M, Conner-Kerr T, Davidson J, DiPietro L, Falanga V, Fife C, Gardner S, Grice E, Harmon J, Hazzard WR, High KP, Houghton P, Jacobson N, Kirsner RS, Kovacs EJ, Margolis D, McFarland HF, Reed MJ, Sullivan DH, Thom S, Tomic-Canic M, Walston J, Whitney J, Williams J, Ziemann S, Schmader K: Chronic Wound Repair and Healing in Older Adults: Current Status and Future Research. *Wound Repair Regen* 2014.

**49.** Abadir PM, Foster DB, Crow M, Cooke CA, Rucker JJ, Jain A, Smith BJ, Burks TN, Cohn RD, Fedarko NS, Carey RM, O'Rourke B, Walston JD: Identification and characterization of a functional mitochondrial angiotensin system. *Proc Natl Acad Sci U S A* 2011;108:14849-14854.

50. Abadir PM: The frail renin-angiotensin system. Clin Geriatr Med 2011;27:53-65.
